# Supplementary material for: Bacterial degradation activity in the eastern tropical South Pacific oxygen minimum zone
Source: Copernicus journal article supplement (doi:10.5194/bg-17-215-2020), 2020-01-17
Supplement: Supplementary file 1 [file bg-17-215-2020-supplement.pdf]

Supplement of Biogeosciences, 17, 215–230, 2020  
<https://doi.org/10.5194/bg-17-215-2020-supplement>  
© Author(s) 2020. This work is distributed under  
the Creative Commons Attribution 4.0 License.

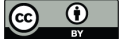

*Supplement of*

## **Bacterial degradation activity in the eastern tropical South Pacific oxygen minimum zone**

**Marie Maßmig et al.**

*Correspondence to:* Anja Engel (aengel@geomar.de)

The copyright of individual parts of the supplement might differ from the CC BY 4.0 License.

This supplementary includes the following supporting information:

**Supplementary Methods:** Detailed description of dissolved organic carbon and dissolved oxygen flux calculations.

**Supplementary Discussion:** Discussion about the incubation of extracellular enzyme samples under N<sub>2</sub> atmosphere.

5 **Supplementary Figure 1:** Oxygen content, temperature and chlorophyll concentrations of the remaining transects not represented as figure within the manuscript.

**Supplementary Figure 2:** Total versus cell-specific bacterial production rates that were sampled at *in situ* oxygen concentrations < 20 μmol O<sub>2</sub> kg<sup>-1</sup>.

10 **Supplementary Figure 3:** Original measurements before temperature correction of extracellular enzyme rates at different *in situ* oxygen concentrations.

**Supplementary Figure 4:** Original measurements before temperature correction of extracellular enzyme rates with all samples incubated under N<sub>2</sub> atmosphere irrespective of the *in situ* oxygen concentration.

**Supplementary Table 1:** Cruise, date, positions, sampled depths and bottom depth of all stations represented within the manuscript.

15 **Supplementary Table 2:** Average and standard deviation at different oxygen regimes of all discussed parameters.

## Supplementary Methods:

### Diapycnal fluxes of oxygen and dissolved organic carbon

The mixing of DOC and oxygen across density surfaces is derived following Fischer et al. (2013) and Schafstall et al. (2010). Gradients of DOC were calculated between sampled bottles assuming a constant gradient in between while oxygen gradients were derived by fitting a linear trend over 3 m intervals, as oxygen is available on a much higher vertical resolution of 1dbar.

The diapycnal flux of solutes, i.e. DOC and oxygen, is calculated as

$$\Phi_S = -K_\rho \nabla C_S$$

Where  $\nabla C_S$  is the vertical gradient of the solute – in case of oxygen the concentration is converted from  $\mu\text{mol kg}^{-1}$  to  $\mu\text{mol m}^{-3}$  beforehand – and  $K_\rho$  is the diapycnal diffusivity of mass. We assume  $K_\rho$  to be equal to the diffusivity of DOC and oxygen, i.e.  $K_\rho = K_{DOC} = K_{DO}$  as done by Fischer et al. (2013) for oxygen.

The diapycnal diffusivity is calculated following Osborn (1980):

$$K_\rho = \Gamma \frac{\varepsilon}{N^2}$$

Where  $\Gamma = 0.2$  is the mixing efficiency,  $\varepsilon$  ( $\text{m}^2 \text{s}^{-3}$ ) is the dissipation rate of turbulent kinetic energy calculated by integrating the shear spectra derived from measurements on a freefalling microstructure probe at stations G-N & Q-T (Sea & Sun Technology, MSS90D, S/N26 up to CTD 43, S/N 73 afterwards) (Schafstall et al., 2010), and  $N$  ( $\text{s}^{-1}$ ) is the buoyancy frequency derived from CTD downcast profiles over 7 dbar intervals where DOC and oxygen were measured as well.

To calculate  $K_\rho$ , data from CTD profiles were combined with nearby microstructure profiles conducted directly before or after the CTD profile which existed for 12 profiles. For each solute gradient between two samples a  $K_\rho$  value was derived from dissipation and buoyancy frequency averaged between the potential densities of the two solutes samples. The mean  $K_\rho$  profile exhibits only weak vertical variations (Figure 5a) therefore a constant  $K_\rho = 10^{-3} \text{m}^2 \text{s}^{-1}$  was used to calculate fluxes.

For each profile a  $\Phi_S$  profile is calculated in 20 m depth bins, from these a mean profile of diapycnal flux is derived. Subsequent, the vertical divergence of the mean flux profile of DOC or oxygen is given by  $\nabla \Phi_S = -\frac{\partial}{\partial z} \Phi_S$ .

The error estimates of these terms are calculated following Schafstall et al. (2010), with the error of the mean  $K_\rho$  given by:

$$\Delta K_\rho = K_\rho \left[ \left( \frac{\Delta \Gamma}{\Gamma} \right)^2 + \left( \frac{\Delta \varepsilon}{\varepsilon} \right)^2 + \left( \frac{\Delta N^2}{N^2} \right)^2 \right]^{\frac{1}{2}}$$

And the error of the mean flux by

$$\Delta\Phi_S = \Phi_S \left[ \left( \frac{\Delta\Gamma}{\Gamma} \right)^2 + \left( \frac{\Delta\varepsilon}{\varepsilon} \right)^2 + \left( \frac{\Delta N^2}{N^2} \right)^2 + \left( \frac{\Delta\nabla C_S}{\nabla C_S} \right)^2 \right]^{\frac{1}{2}}$$

Where  $K_p$  and  $\Phi_S$  are the mean profiles calculated from the individual profiles in 20 m depth bins, a constant  $\Delta\Gamma = 0.04$  is used (Schafstall et al., 2010), the error of dissipation  $\Delta\varepsilon$  is the 95%-confidence interval derived by bootstrapping,  $\Delta N^2$  and  $\Delta\nabla C_S$  are the standard deviations of the mean. Bootstrapping and standard deviations are performed on the values of the individual profiles in 20 m bins. The error of the change in the diapycnal flux over depth is derived by error propagation from the flux.

### Supplementary Discussion:

#### Incubation of extracellular enzyme samples under N<sub>2</sub> atmosphere

Enzyme rates of suboxic waters have been obtained by incubating samples under N<sub>2</sub> atmosphere to reduce oxygen concentrations. For the assessment of extracellular enzyme rates we chose to incubate samples at oxic and reduced oxygen concentrations depending on oxygen concentrations at *in situ* depth (see methods for details). Incubation conditions slightly influenced the resulting enzyme rates. Incubating samples from depths with *in situ* oxygen concentrations <5  $\mu\text{mol kg}^{-1}$  under N<sub>2</sub> atmosphere, instead of under atmospheric oxygen concentrations, yielded on average 2-27% higher rates. Consequently, the differences in rates between oxic and suboxic waters became reduced, when all samples were incubated under N<sub>2</sub> atmosphere (supplementary Fig. 3 and 4). However, the observed trends over depth remained similar. Possible reasons for higher extracellular enzyme rates after incubation under N<sub>2</sub> atmosphere are changes in (i) pH, (ii) the abundance of oxygen radicals and/or (iii) changes in enzyme production. (i) Higher extracellular enzyme rates after incubations at low oxygen concentrations are less likely driven by the resulting increase in pH ( $\Delta 0.4$ ), since earlier studies rather suggested that extracellular enzyme rates decrease with pH (Endres et al., 2014; Piontek et al., 2013). (ii) Oxygen radicals can destroy enzymes (Eltner, 1990). Since our incubations were not completely anoxic, an influence of oxygen radicals on enzyme activity cannot be excluded, but would appear under aerobic and N<sub>2</sub> atmosphere. (iii) Finally, an enhanced production of enzymes within the 12 hours of incubation time might be the reason for higher rates after incubations under N<sub>2</sub> atmosphere. It has been shown before that enzymes can be produced within minutes (Both et al., 1972), making this explanation likely. The final reason for higher enzyme productions under N<sub>2</sub> atmosphere remains a matter of speculation, but supports the trends seen in the depth profiles and does not restrict the interpretation of the extracellular enzyme data.

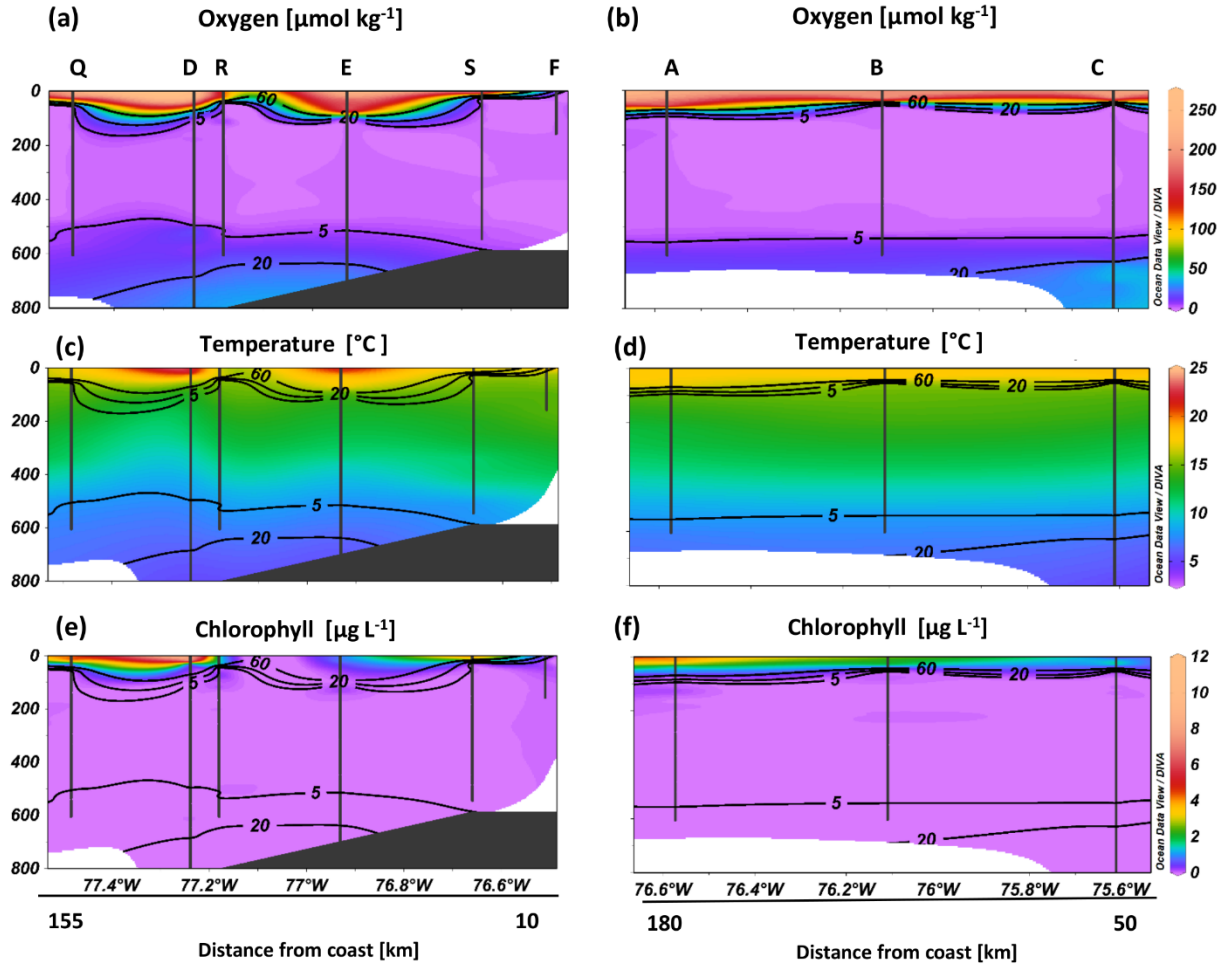

**Supplementary Figure 1:** Oxygen content (a, b), temperature (c, d) and chlorophyll concentrations (e-f) of the remaining two transects that are not represented in Figure 3 in the manuscript.

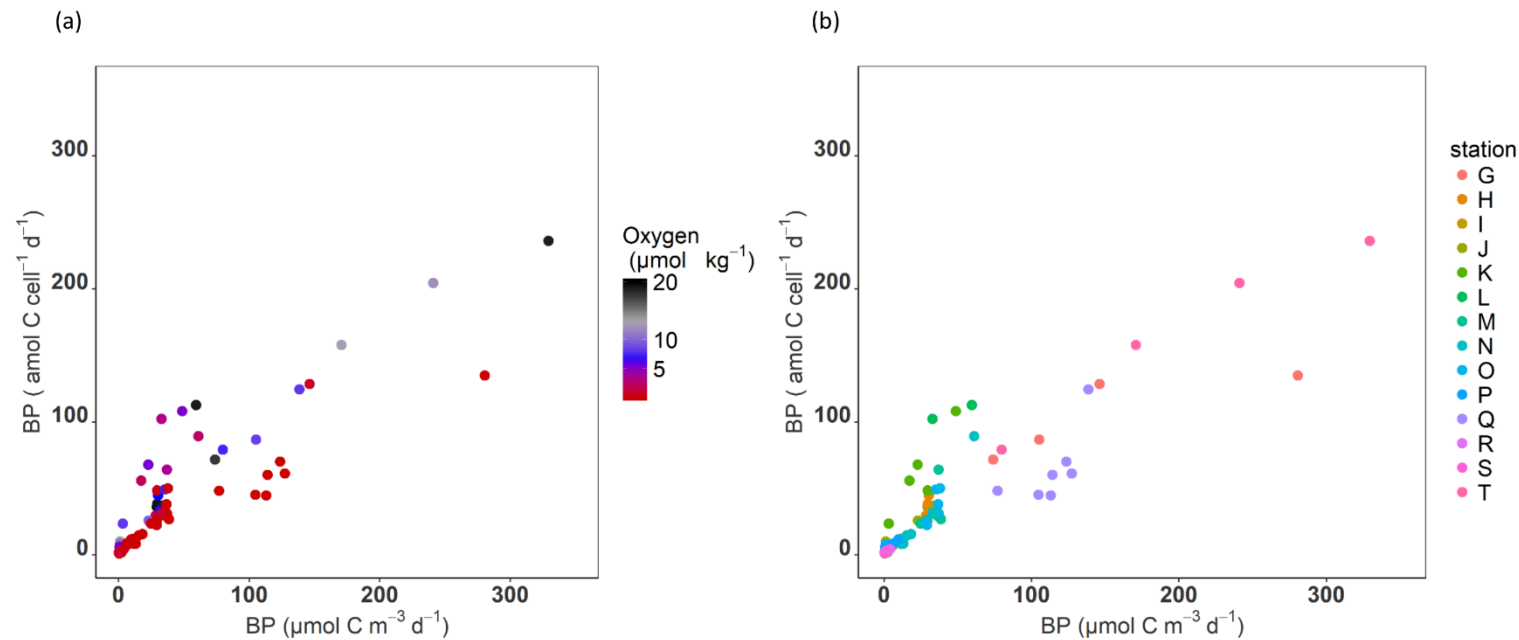

70 **Supplementary Figure 2:** Total versus cell-specific bacterial production that were at *in situ* oxygen concentrations <  $20 \mu\text{mol O}_2 \text{ kg}^{-1}$  with oxygen concentrations (a) and stations (b) indicated by color-coding.

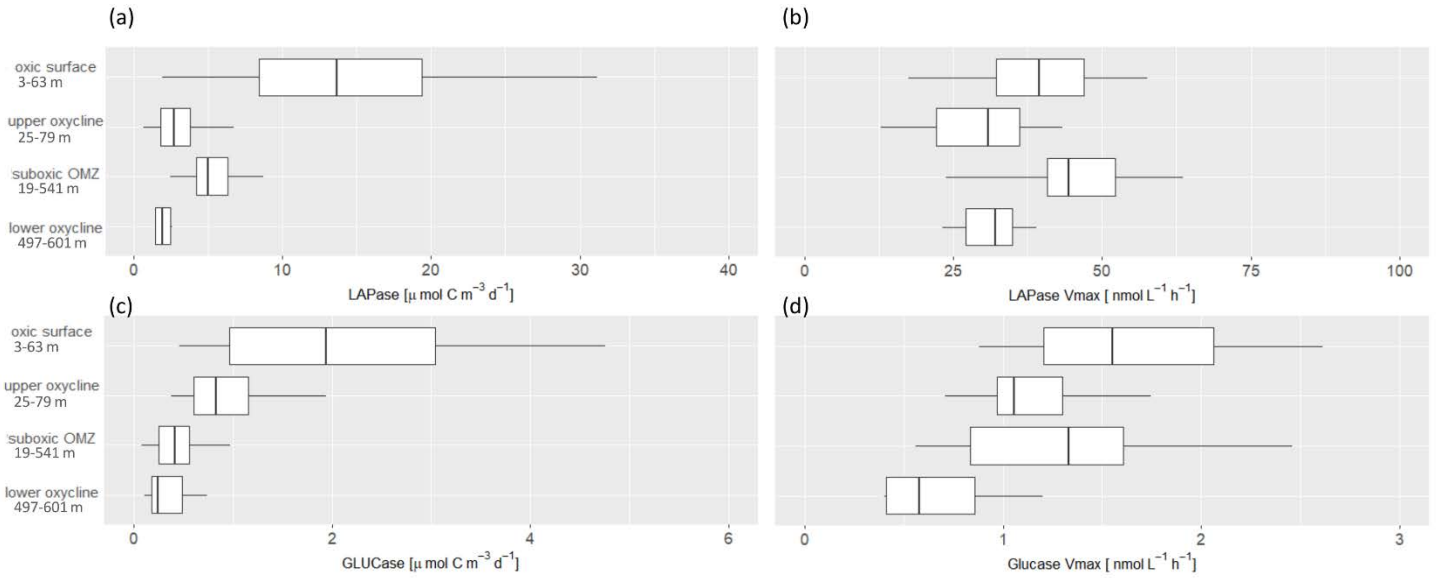

**Supplementary Figure 3:** Original measurements before temperature correction of extracellular enzyme rates at different *in situ* oxygen concentrations for comparison with measured enzyme rates that were all incubated under  $\text{N}_2$  atmosphere (supplementary Figure 4). Degradation rates of dissolved amino acids (DHAA) by leucine-aminopeptidase (LAPase) **(a)**, total potential LAPase rates ( $V_{\text{max}}$ ) **(b)**, degradation rates of high molecular weight dissolved carbohydrates (DCHO) by  $\beta$ -glucosidase (GLUCase) **(c)** and Glucose  $V_{\text{max}}$  **(d)** at different oxygen regimes.

75

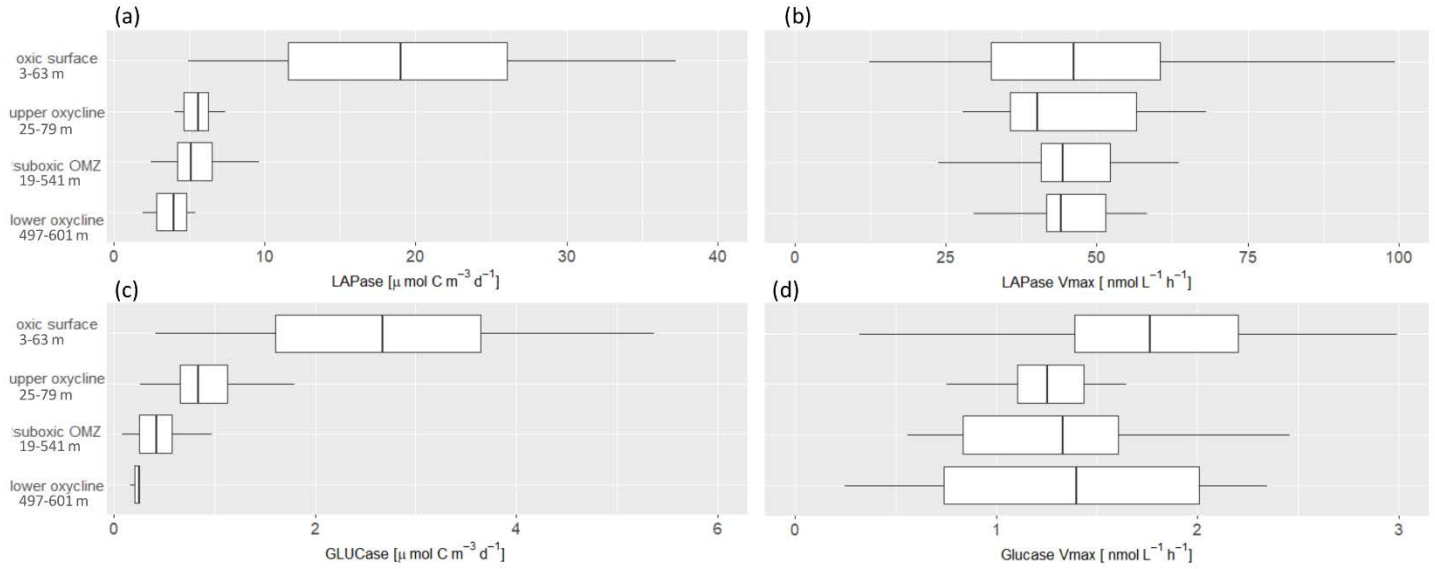

80 **Supplementary Figure 4:** Original measurements before temperature correction of extracellular enzyme rates with all samples incubated under  $\text{N}_2$  atmosphere irrespective of the *in situ* oxygen concentration. Degradation rates of dissolved amino acids (DHAA) by leucine-aminopeptidase (LAPase) **(a)** total potential LAPase rates ( $V_{\text{max}}$ ) **(b)**, degradation rates of high molecular weight dissolved carbohydrates (DCHO) by  $\beta$ -glucosidase (GLUCase) **(c)** Glucose  $V_{\text{max}}$  **(d)** at different oxygen regimes.



85 **Supplementary Table 1:** Cruise, date, positions, sampled depths and bottom depth of all stations represented within the manuscript. Extracellular enzyme rates were sampled at stations A-K, whereas some depths were not used for further analyses, since the standard deviation was over 30%. Bacterial biomass production was sampled at stations G-T. Stations G-T were included in the estimation of carbon and oxygen loss rates. Cell abundance was sampled at every station.

| Cruise | Station | Latitude | Longitude | Date       | Sampled Depth |     |     |     |      | Bottom Depth |
|--------|---------|----------|-----------|------------|---------------|-----|-----|-----|------|--------------|
| M138   | A       | -15.5393 | -75.6149  | 06/19/2017 | 3             | 17  | 24  | 28  | 39   | 2507         |
|        |         |          |           |            | 99            | 197 | 396 | 596 | 1499 |              |
| M138   | B       | -15.8595 | -76.1099  | 06/21/2017 | 5             | 18  | 40  | 50  | 53   | 2624         |
|        |         |          |           |            | 90            | 199 | 398 | 600 |      |              |
| M138   | C       | -16.1593 | -76.5711  | 06/21/2017 | 3             | 13  | 19  | 58  | 63   | 3679         |
|        |         |          |           |            | 79            | 99  | 149 | 197 | 347  | 600          |
| M138   | D       | -13.9971 | -76.6598  | 06/16/2017 | 3             | 8   | 19  | 48  | 70   | 586          |
|        |         |          |           |            | 98            | 117 | 197 | 397 | 498  | 541          |
| M138   | E       | -14.2988 | -77.1796  | 06/17/2017 | 19            | 38  | 47  | 66  | 97   | 4702         |
|        |         |          |           |            | 147           | 198 | 299 | 398 | 497  | 601          |
| M138   | F       | -14.7596 | -77.4829  | 06/23/2017 | 9             | 28  | 48  | 53  | 99   | 4154         |
|        |         |          |           |            | 148           | 197 | 297 | 397 | 497  | 601          |
| M136   | G       | -12.2248 | -77.1795  | 04/27/2017 | 4             | 20  | 25  | 30  | 39   | 75           |
|        |         |          |           |            | 49            | 59  | 72  |     |      |              |
| M136   | H       | -12.3584 | -77.3621  | 04/25/2017 | 3             | 6   | 27  | 39  | 48   | 194          |
|        |         |          |           |            | 58            | 68  | 79  | 98  | 128  |              |
| M136   | I       | -12.453  | -77.4918  | 04/26/2017 | 4             | 18  | 28  | 39  | 49   | 403          |
|        |         |          |           |            | 59            | 73  | 199 |     |      |              |
| M136   | J       | -12.5807 | -77.6731  | 04/29/2017 | 4             | 28  | 49  | 68  | 78   | 973          |
|        |         |          |           |            | 99            | 195 | 393 | 448 | 498  | 598          |
| M136   | K       | -12.338  | -78.0512  | 04/26/2017 | 9             | 50  | 75  | 99  | 148  | 1970         |
|        |         |          |           |            | 157           | 199 | 299 | 398 | 499  | 599          |
| M136   | L       | -12.2782 | -77.2493  | 04/20/2017 | 4             | 9   | 13  | 19  | 23   | 130          |
|        |         |          |           |            | 28            | 43  | 48  | 58  |      |              |
| M136   | M       | -12.3882 | -77.40297 | 04/19/2017 | 3             | 19  | 39  | 55  | 65   | 242          |
|        |         |          |           |            | 90            | 98  | 199 | 238 |      |              |
| M136   | N       | -12.4134 | -77.4425  | 04/21/2017 | 3             | 18  | 50  | 99  | 124  | 307          |
|        |         |          |           |            | 149           | 174 | 224 | 272 | 300  |              |
| M136   | O       | -12.5226 | -77.5834  | 04/20/2017 | 4             | 29  | 39  | 49  | 59   | 751          |
|        |         |          |           |            | 79            | 89  | 98  | 147 | 597  | 745          |
| M136   | P       | -12.9873 | -78.2471  | 04/21/2017 | 4             | 29  | 49  | 60  | 74   | 5410         |
|        |         |          |           |            | 99            | 196 | 296 | 396 | 599  | 800          |
| M136   | Q       | -13.8938 | -76.5101  | 04.12.2017 | 4             | 10  | 15  | 19  | 30   | 166          |
|        |         |          |           |            | 39            | 50  | 69  | 99  | 128  | 159          |
| M136   | R       | -14.1878 | -76.9312  | 04/13/2017 | 5             | 14  | 29  | 49  | 81   | 3042         |
|        |         |          |           |            | 101           | 123 | 199 | 399 | 599  |              |
| M136   | S       | -14.3986 | -77.2389  | 04/14/2017 | 1             | 49  | 89  | 99  | 148  | 5149         |
|        |         |          |           |            | 198           | 299 | 399 | 499 | 599  |              |
| M136   | T       | -12.2254 | -77.1797  | 04/24/2017 | 4             | 19  | 24  | 28  | 49   | 76           |

90

95 **Supplementary Table 2:** Average and standard deviation at different oxygen regimes of all discussed parameters as total rates and cell abundance (**a**) and cell-specific rates (**b**). Rates are indicated as temperature corrected *in situ* rates and original measurements during incubation. Differences between oxygen regimes were tested with a *Wilcoxon test* (W) and correlation with the *Spearman Rank correlation* (S).

| a                                                                                  |           |                    |    | original measurements |      | temperature corrected |              |                                                        |                     |         |
|------------------------------------------------------------------------------------|-----------|--------------------|----|-----------------------|------|-----------------------|--------------|--------------------------------------------------------|---------------------|---------|
| parameter                                                                          | station   | oxygen regime      | n  | mean                  | SD   | mean                  | SD           | oxygen regime                                          | test statistics     | p-value |
| bacterial production<br>[ $\mu\text{mol C m}^{-3} \text{d}^{-1}$ ]                 | G-T       | top oxic           | 34 | 194                   | 189  | 603                   | 618          | top oxic-OMZ                                           | W=145               | <0.001  |
|                                                                                    |           | top high hypoxic   | 11 | 58                    | 61   | 126                   | 140          | OMZ, low hypoxic<br>(correlation BP vs. $\text{O}_2$ ) | S=51692,<br>rho=0.1 | 0.4     |
|                                                                                    |           | top low hypoxic    | 17 | 43                    | 38   | 87                    | 87           |                                                        |                     |         |
|                                                                                    |           | OMZ                | 48 | 26                    | 32   | 37                    | 53           |                                                        |                     |         |
|                                                                                    |           | bottom low hypoxic | 5  | 5                     | 3    | 1                     | 1            | OMZ-bottom low hypoxic                                 | W=30                | <0.01   |
|                                                                                    | oxyclines | 33                 | 42 | 47                    | 87   | 108                   | oxycline-OMZ | W=439                                                  | 0.1                 |         |
|                                                                                    | OMZ       | 46                 | 22 | 24                    | 30   | 35                    |              |                                                        |                     |         |
|                                                                                    | H-S       | oxyclines          | 25 | 27                    | 30   | 50                    | 66           | oxycline-OMZ                                           | W=9                 | 0.89    |
|                                                                                    | G&T       | OMZ                | 2  | 120                   | 57   | 213                   | 95           |                                                        |                     |         |
| oxyclines                                                                          | 8         | 91                 | 57 | 204                   | 132  |                       |              |                                                        |                     |         |
| degradation rates of DHAA by LAPase<br>[ $\mu\text{mol C m}^{-3} \text{d}^{-1}$ ]  | A-K       | top oxic           | 20 | 13.9                  | 7.6  | 16.3                  | 9.2          | oxycline-OMZ                                           | W=701               | <0.001  |
|                                                                                    |           | top high hypoxic   | 6  | 4.5                   | 3.0  | 4.9                   | 3.3          |                                                        |                     |         |
|                                                                                    |           | top low hypoxic    | 9  | 2.4                   | 1.2  | 2.6                   | 1.3          |                                                        |                     |         |
|                                                                                    |           | OMZ                | 40 | 5.5                   | 2.1  | 5.5                   | 2.1          |                                                        |                     |         |
|                                                                                    |           | bottom low hypoxic | 6  | 2.4                   | 1.6  | 2.0                   | 1.3          |                                                        |                     |         |
|                                                                                    |           | oxyclines          | 21 | 3.0                   | 2.1  | 3.1                   | 2.3          |                                                        |                     |         |
| degradation rates of DCHO by GLUCase<br>[ $\mu\text{mol C m}^{-3} \text{d}^{-1}$ ] | A-K       | top oxic           | 22 | 2.74                  | 2.45 | 3.5                   | 3.3          | oxycline-OMZ                                           | W=184               | <0.01   |
|                                                                                    |           | top high hypoxic   | 7  | 1.45                  | 1.02 | 1.7                   | 1.2          |                                                        |                     |         |
|                                                                                    |           | top low hypoxic    | 8  | 0.76                  | 0.51 | 0.9                   | 0.6          |                                                        |                     |         |
|                                                                                    |           | OMZ                | 38 | 0.69                  | 1.29 | 0.7                   | 1.3          |                                                        |                     |         |
|                                                                                    |           | bottom low hypoxic | 3  | 0.36                  | 0.33 | 0.3                   | 0.2          |                                                        |                     |         |
|                                                                                    |           | oxyclines          | 18 | 1.00                  | 0.80 | 1.1                   | 1.0          |                                                        |                     |         |
| LAPase Vmax<br>[ $\text{nmol L h}^{-1}$ ]                                          | A-K       | top oxic           | 22 | 39.2                  | 13.3 | 45.2                  | 15.7         | oxycline-OMZ                                           | W=1012              | <0.001  |
|                                                                                    |           | top high hypoxic   | 10 | 41.1                  | 24.0 | 45.5                  | 26.4         |                                                        |                     |         |
|                                                                                    |           | top low hypoxic    | 10 | 28.9                  | 13.6 | 31.5                  | 14.9         |                                                        |                     |         |
|                                                                                    |           | OMZ                | 49 | 49.9                  | 22.1 | 49.5                  | 20.8         |                                                        |                     |         |
|                                                                                    |           | bottom low hypoxic | 6  | 31.3                  | 6.0  | 26.0                  | 5.0          |                                                        |                     |         |
|                                                                                    |           | oxyclines          | 26 | 34.1                  | 17.7 | 35.6                  | 20.1         |                                                        |                     |         |
| GLUCase Vmax<br>[ $\text{nmol L h}^{-1}$ ]                                         | A-K       | top oxic           | 26 | 1.6                   | 0.6  | 2.1                   | 0.7          | oxycline-OMZ                                           | W=555.5             | 0.4     |
|                                                                                    |           | top high hypoxic   | 9  | 1.4                   | 0.5  | 1.7                   | 0.5          |                                                        |                     |         |
|                                                                                    |           | top low hypoxic    | 11 | 1.0                   | 0.3  | 1.1                   | 0.4          |                                                        |                     |         |
|                                                                                    |           | OMZ                | 41 | 1.6                   | 1.6  | 1.6                   | 1.5          |                                                        |                     |         |
|                                                                                    |           | bottom low hypoxic | 4  | 0.7                   | 0.4  | 0.5                   | 0.3          |                                                        |                     |         |
|                                                                                    |           | oxyclines          | 24 | 1.1                   | 0.5  | 1.2                   | 0.6          |                                                        |                     |         |
| cell abundance<br>[ $\times 10^5 \text{ cells mL}^{-1}$ ]                          | A-T       | top oxic           | 52 | 19.2                  | 9.2  |                       |              | oxycline-OMZ                                           | 3031                | <0.01   |
|                                                                                    |           | top high hypoxic   | 16 | 9.4                   | 3.0  |                       |              |                                                        |                     |         |
|                                                                                    |           | top low hypoxic    | 20 | 8.4                   | 3.0  |                       |              |                                                        |                     |         |
|                                                                                    |           | OMZ                | 93 | 9.0                   | 5.0  |                       |              |                                                        |                     |         |
|                                                                                    |           | bottom low hypoxic | 14 | 1.2                   | 0.1  |                       |              |                                                        |                     |         |
|                                                                                    |           | oxyclines          | 51 | 6.6                   | 4.3  |                       |              |                                                        |                     |         |

| <b>b</b>                                                                                                  |                |                      |          | <b>original measurements</b> |           | <b>temperature corrected</b> |           |                                                          |                        |                |
|-----------------------------------------------------------------------------------------------------------|----------------|----------------------|----------|------------------------------|-----------|------------------------------|-----------|----------------------------------------------------------|------------------------|----------------|
| <b>parameter</b>                                                                                          | <b>station</b> | <b>oxygen regime</b> | <b>n</b> | <b>mean</b>                  | <b>SD</b> | <b>mean</b>                  | <b>SD</b> | <b>oxygen regime</b>                                     | <b>test statistics</b> | <b>p-value</b> |
| <b>cell-specific bacterial production</b><br>[amol C cell <sup>-1</sup> d <sup>-1</sup> ]                 | G-T            | top oxic             | 34       | 92                           | 78        | 282                          | 265       | OMZ, low hypoxic<br>(correlation BP vs. O <sub>2</sub> ) | S=36615,<br>rho=0.36   | <0.01          |
|                                                                                                           |                | top high hypoxic     | 11       | 50                           | 36        | 105                          | 85        |                                                          |                        |                |
|                                                                                                           |                | top low hypoxic      | 17       | 46                           | 27        | 89                           | 62        |                                                          |                        |                |
|                                                                                                           |                | OMZ                  | 48       | 22                           | 19        | 31                           | 33        |                                                          |                        |                |
|                                                                                                           |                | bottom low hypoxic   | 5        | 35                           | 23        | 11                           | 7         |                                                          |                        |                |
|                                                                                                           |                | oxyclines            | 33       | 45                           | 29        | 82                           | 72        |                                                          |                        |                |
|                                                                                                           | H-S            | OMZ                  | 46       | 20                           | 16        | 26                           | 25        | oxycline-OMZ                                             | W=301                  | <0.001         |
|                                                                                                           |                | oxyclines            | 25       | 37                           | 23        | 58                           | 51        |                                                          |                        |                |
|                                                                                                           | G&T            | OMZ                  | 2        | 73                           | 5         | 132                          | 4         | oxycline-OMZ                                             | W=6                    | 0.7            |
| oxyclines                                                                                                 |                | 8                    | 71       | 34                           | 158       | 78                           |           |                                                          |                        |                |
| <b>cell-specific Degradation rates of DHAA by LAPase</b><br>[amol C cell <sup>-1</sup> d <sup>-1</sup> ]  | A-K            | top oxic             | 20       | 6.5                          | 3.4       | 7.6                          | 4.2       | bottom low hypoxic - remaining regimes                   | W=380                  | <0.01          |
|                                                                                                           |                | top high hypoxic     | 6        | 4.6                          | 3.1       | 5.0                          | 3.4       |                                                          |                        |                |
|                                                                                                           |                | top low hypoxic      | 9        | 3.1                          | 1.6       | 3.3                          | 1.7       |                                                          |                        |                |
|                                                                                                           |                | OMZ                  | 40       | 12.3                         | 14.4      | 11.7                         | 12.2      |                                                          |                        |                |
|                                                                                                           |                | bottom low hypoxic   | 6        | 21.5                         | 15.4      | 17.9                         | 12.7      |                                                          |                        |                |
|                                                                                                           |                | oxyclines            | 21       | 8.8                          | 11.5      | 8.0                          | 9.3       |                                                          |                        |                |
| <b>cell-specific Degradation rates of DCHO by GLUCase</b><br>[amol C cell <sup>-1</sup> d <sup>-1</sup> ] | A-K            | top oxic             | 22       | 1.3                          | 1.2       | 1.7                          | 1.5       | bottom low hypoxic - remaining regimes                   | W=150                  | 0.33           |
|                                                                                                           |                | top high hypoxic     | 7        | 1.4                          | 1.1       | 1.6                          | 1.3       |                                                          |                        |                |
|                                                                                                           |                | top low hypoxic      | 8        | 1.1                          | 0.8       | 1.2                          | 0.9       |                                                          |                        |                |
|                                                                                                           |                | OMZ                  | 38       | 1.2                          | 1.7       | 1.1                          | 1.6       |                                                          |                        |                |
|                                                                                                           |                | bottom low hypoxic   | 3        | 3.2                          | 3.2       | 2.3                          | 2.3       |                                                          |                        |                |
|                                                                                                           |                | oxyclines            | 18       | 1.6                          | 1.6       | 1.6                          | 1.3       |                                                          |                        |                |
| <b>cell-specific LAPase Vmax</b> [amol cell <sup>-1</sup> h <sup>-1</sup> ]                               | A-K            | top oxic             | 22       | 23.1                         | 15.1      | 26.4                         | 16.9      | bottom low hypoxic - remaining regimes                   | W=523                  | <0.001         |
|                                                                                                           |                | top high hypoxic     | 10       | 44.0                         | 29.7      | 48.8                         | 32.6      |                                                          |                        |                |
|                                                                                                           |                | top low hypoxic      | 10       | 40.0                         | 22.8      | 43.4                         | 24.7      |                                                          |                        |                |
|                                                                                                           |                | OMZ                  | 49       | 103.5                        | 114.2     | 99.0                         | 97.4      |                                                          |                        |                |
|                                                                                                           |                | bottom low hypoxic   | 6        | 274.0                        | 51.6      | 227.3                        | 42.6      |                                                          |                        |                |
|                                                                                                           |                | oxyclines            | 26       | 95.5                         | 104.7     | 87.9                         | 83.88     |                                                          |                        |                |
| <b>cells-specific GLUCase Vmax</b> [amol cell <sup>-1</sup> h <sup>-1</sup> ]                             | A-K            | top oxic             | 26       | 0.9                          | 0.4       | 1.1                          | 0.4       | bottom low hypoxic - remaining regimes                   | W=314                  | <0.01          |
|                                                                                                           |                | top high hypoxic     | 9        | 1.5                          | 0.6       | 1.6                          | 0.7       |                                                          |                        |                |
|                                                                                                           |                | top low hypoxic      | 11       | 1.3                          | 0.5       | 1.5                          | 0.5       |                                                          |                        |                |
|                                                                                                           |                | OMZ                  | 41       | 2.7                          | 2.4       | 2.7                          | 2.3       |                                                          |                        |                |
|                                                                                                           |                | bottom low hypoxic   | 4        | 6.0                          | 3.6       | 5.0                          | 2.8       |                                                          |                        |                |
|                                                                                                           |                | oxyclines            | 24       | 2.1                          | 2.2       | 2.1                          | 1.7       |                                                          |                        |                |

105 **References\_supplement**

Both, G. W., McInnes, J. L., Hanlon, J. E., May, B. K. and Elliott, W. H.: Evidence for an accumulation of messenger RNA specific for extracellular protease and its relevance to the mechanism of enzyme secretion in bacteria, *J. Mol. Biol.*, 67(2), 199–217, doi:10.1016/0022-2836(72)90236-7, 1972.

Elstner, E. F., Ed.: *Der Sauerstoff: Biochemie, Biologie, Medizin*, BI-Wiss\_Verl, Mannheim., 1990.

110 Endres, S., Galgani, L., Riebesell, U., Schulz, K.-G. and Engel, A.: Stimulated Bacterial Growth under Elevated pCO<sub>2</sub>: Results from an Off-Shore Mesocosm Study, edited by S. Dupont, *PLoS One*, 9(6), e99228, doi:10.1371/journal.pone.0099228, 2014.

115 Fischer, T., Banyte, D., Brandt, P., Dengler, M., Krahmann, G., Tanhua, T. and Visbeck, M.: Diapycnal oxygen supply to the tropical North Atlantic oxygen minimum zone, *Biogeosciences*, 10(7), 5079–5093, doi:10.5194/bg-10-5079-2013, 2013.

Osborn, T. R.: Estimates of the local rate of vertical diffusion from dissipation measurements, *J. Phys. Oceanogr.*, 10(1), 83–89, doi:10.1175/1520-0485, 1980.

120 Piontek, J., Borchard, C., Sperling, M., Schulz, K. G., Riebesell, U. and Engel, A.: Response of bacterioplankton activity in an Arctic fjord system to elevated pCO<sub>2</sub>: results from a mesocosm perturbation study, *Biogeosciences*, 10(1), 297–314, doi:10.5194/bg-10-297-2013, 2013.

Schafstall, J., Dengler, M., Brandt, P. and Bange, H.: Tidal-induced mixing and diapycnal nutrient fluxes in the Mauritanian upwelling region, *J. Geophys. Res.*, 115(C10), C10014, doi:10.1029/2009JC005940, 2010.
